# Supplementary material
Source: HighWire-hosted journal article supplement (https://jech.bmj.com/content/jech-2024-222396)
Supplement: inline-supplementary-material-1 [file inline-supplementary-material-1.pdf]

## Appendix 1

| Medcodeid         | Term                                                   | SnomedConceptID  | Category |
|-------------------|--------------------------------------------------------|------------------|----------|
| 12618981000006111 | Signposting to benefits advisor                        | 1104561000000107 | Benefits |
| 32441000000117    | DS1500 form - attendance allowance claim               | 13571000000107   | Benefits |
| 34021000000110    | IB113 DLS Incapacity for work form completed           | 14111000000105   | Benefits |
| 34041000000115    | IB113 DLS Incapacity for work form sent                | 14121000000104   | Benefits |
| 34061000000119    | IB113 DLS Incapacity for work form received            | 14131000000102   | Benefits |
| 34081000000111    | IB113 DLS Incapacity for work form paid                | 14141000000106   | Benefits |
| 141281000006119   | Sickness benefit                                       | 160979005        | Benefits |
| 251019010         | Sickness benefit                                       | 160979005        | Benefits |
| 744681000006113   | Invalidity pension                                     | 160981007        | Benefits |
| 251023019         | Invalidity pension                                     | 160981007        | Benefits |
| 251022012         | Disablement pension                                    | 160981007        | Benefits |
| 251024013         | Severe disablement allowance                           | 160982000        | Benefits |
| 251027018         | Attendance allowance                                   | 160983005        | Benefits |
| 251028011         | Receipt of Attendance Allowance                        | 160984004        | Benefits |
| 251029015         | Mobility allowance                                     | 160985003        | Benefits |
| 251033010         | Industrial disablement benefit                         | 160987006        | Benefits |
| 4537401000006117  | Industrial injuries disablement benefit                | 160987006        | Benefits |
| 251037011         | War disablement pension                                | 160989009        | Benefits |
| 251039014         | Disability living allowance                            | 160991001        | Benefits |
| 4537451000006118  | DLA - Disability living allowance                      | 160991001        | Benefits |
| 251052016         | Widows allowance                                       | 160999004        | Benefits |
| 251053014         | Widowed mother's allowance                             | 161000000        | Benefits |
| 251054015         | Widows pension                                         | 161001001        | Benefits |
| 251056018         | War widows pension                                     | 161003003        | Benefits |
| 251058017         | Unemployment benefits                                  | 161005005        | Benefits |
| 251061016         | Unemployment benefit NOS                               | 161006006        | Benefits |
| 251059013         | Unemployment benefit                                   | 161006006        | Benefits |
| 251069019         | Parent's benefits                                      | 161014000        | Benefits |
| 251072014         | One parent benefit                                     | 161017007        | Benefits |
| 251073016         | Child's special allowance                              | 161018002        | Benefits |
| 251087016         | Low income benefits NOS                                | 161020004        | Benefits |
| 251075011         | Low income benefits                                    | 161020004        | Benefits |
| 251078013         | Housing benefit                                        | 161023002        | Benefits |
| 251083017         | School meals free                                      | 161028006        | Benefits |
| 251084011         | School fares free                                      | 161029003        | Benefits |
| 251085012         | School uniform free                                    | 161030008        | Benefits |
| 4537851000006115  | Entitled to benefits                                   | 161040006        | Benefits |
| 12221000000118    | IB74 Incapacity benefit                                | 1641000000103    | Benefits |
| 12601000000112    | DLA 370 Disability living allowance completed          | 16681000000104   | Benefits |
| 265021012         | Benefits counselling                                   | 171001002        | Benefits |
| 1713191000006111  | War pensions report                                    | 1713191000006107 | Benefits |
| 265561015         | Attendance allowance medical                           | 171378002        | Benefits |
| 265563017         | Mobility allowance examination                         | 171379005        | Benefits |
| 265562010         | Mobility allowance medical                             | 171379005        | Benefits |
| 8003721000006115  | DS4 attendance allowance examination fee paid          | 17241000000107   | Benefits |
| 1786761000006112  | Employment and support allowance                       | 1786761000006108 | Benefits |
| 1841411000006116  | Employment and Support Allowance form                  | 1841411000006100 | Benefits |
| 1841421000006112  | ESA113 Employment and Support Allowance form received  | 1841421000006108 | Benefits |
| 1841431000006110  | ESA113 Employment and Support Allowance form completed | 1841431000006106 | Benefits |
| 8006141000006118  | Incapacity benefit status                              | 18481000000102   | Benefits |
| 4732431000006114  | Mobility allowance medical <1.5 hours ex-surgery       | 184953003        | Benefits |
| 4732611000006118  | Mobility allowance report - fee paid                   | 185001002        | Benefits |
| 285035019         | War Pensions report requested                          | 185011009        | Benefits |
| 285036018         | War Pensions report sent                               | 185012002        | Benefits |
| 285037010         | Report to benefits agency                              | 185014001        | Benefits |
| 8058581000006114  | Referral to benefits officer                           | 198771000000100  | Benefits |
| 4915861000006113  | Benefits education                                     | 223433009        | Benefits |
| 4915871000006118  | Advice about benefits                                  | 223433009        | Benefits |
| 4924991000006115  | Entitlement to benefits uncertain                      | 224195002        | Benefits |
| 337179018         | Benefits received                                      | 224196001        | Benefits |
| 337180015         | Not receiving all benefits due                         | 224197005        | Benefits |
| 4925021000006117  | Delay in receiving benefits                            | 224198000        | Benefits |
| 4925031000006119  | Loss of benefits                                       | 224199008        | Benefits |
| 4932241000006110  | Benefits and pensions                                  | 224773006        | Benefits |
| 4932251000006112  | Social security benefits                               | 224774000        | Benefits |
| 4932261000006114  | National Health Service benefits                       | 224775004        | Benefits |
| 4932271000006119  | Local authority benefits                               | 224776003        | Benefits |
| 4976581000006115  | Application for benefit                                | 228162002        | Benefits |
| 4976571000006118  | Application for benefit status                         | 228162002        | Benefits |
| 4976601000006113  | Receipt of benefit                                     | 228163007        | Benefits |
| 4988851000006115  | Means tested benefit                                   | 229061000        | Benefits |
| 4988861000006118  | Income support                                         | 229062007        | Benefits |
| 25931000000111    | MY22 - mobility allowance form                         | 23461000000107   | Benefits |
| 8011161000006114  | MY22 - mobility allowance form                         | 23461000000107   | Benefits |
| 251042015         | Sickness/invalid benefit NOS                           | 266975006        | Benefits |
| 251041010         | Benefits - other, specified                            | 266975006        | Benefits |

## Appendix 1

|                  |                                                                             |                  |            |
|------------------|-----------------------------------------------------------------------------|------------------|------------|
| 397805011        | Sickness/invalidity benefit                                                 | 266975006        | Benefits   |
| 169407100006115  | DS1500 attend allowance NOS                                                 | 270377001        | Benefits   |
| 405024012        | DS4 attend allowance exam NOS                                               | 270377001        | Benefits   |
| 63167100006118   | DS4-attendance allowance exam                                               | 270377001        | Benefits   |
| 551627100006114  | DS4 attendance allowance examination                                        | 270377001        | Benefits   |
| 405027017        | Mobility allowance claim rep.                                               | 270389004        | Benefits   |
| 251057010        | Widows benefits NOS                                                         | 270470003        | Benefits   |
| 5342100006114    | Widows pensions                                                             | 270470003        | Benefits   |
| 5338100006116    | Widows allowances                                                           | 270470003        | Benefits   |
| 405075010        | Widows benefits                                                             | 270470003        | Benefits   |
| 551773100006118  | DS1500 attendance allowance exam                                            | 270841001        | Benefits   |
| 418915011        | Invalidity benefit                                                          | 281019004        | Benefits   |
| 70051100006118   | Disability living allowance medical examination fee paid                    | 30752100000103   | Benefits   |
| 70052100006114   | Disability living allowance medical examination fee unpaid                  | 30753100000101   | Benefits   |
| 809953100006114  | Disability living allowance medical examination form sent off               | 30756100000106   | Benefits   |
| 451944019        | War pensions report                                                         | 308619006        | Benefits   |
| 598332100006117  | Benefits, entitlements and rights                                           | 308911007        | Benefits   |
| 284868018        | Social security report status                                               | 309029009        | Benefits   |
| 598405100006110  | War pensions report status                                                  | 309031000        | Benefits   |
| 453975018        | Benefits agency reports fit for work                                        | 310402006        | Benefits   |
| 454029019        | Report requested by benefits agency                                         | 310456004        | Benefits   |
| 810389100006118  | Social services financial assessment                                        | 32378100000106   | Benefits   |
| 73585100000113   | Benefits agency reports unfit for work                                      | 37417100000109   | Benefits   |
| 85192100006119   | Referral to benefits advisor                                                | 51452100000105   | Benefits   |
| 798242100006119  | DS1500 Attendance allowance examination payment claim                       | 539100000104     | Benefits   |
| 1320100000118    | Mobility allowance claim report status                                      | 574100000108     | Benefits   |
| 2594100000119    | Mobility allowance exam admin                                               | 71523100000105   | Benefits   |
| 2560100000114    | Attendance allowance examination administration                             | 71527100000107   | Benefits   |
| 823004100006115  | Allowance                                                                   | 74901100000104   | Benefits   |
| 171481100000118  | DS1500 Disability living allowance report declined                          | 76838100000107   | Benefits   |
| 824871100006117  | Receiving income-related employment and support allowance                   | 78985100000101   | Benefits   |
| 177529100000119  | Receiving carer allowance                                                   | 79411100000107   | Benefits   |
| 1316100000114    | Mobility allowance report completed                                         | 812100000105     | Benefits   |
| 798873100006113  | Mobility allowance report sent off                                          | 813100000107     | Benefits   |
| 1322100000110    | Attendance allowance form completed                                         | 815100000100     | Benefits   |
| 212804100000115  | Employment and support allowance                                            | 81669100000101   | Benefits   |
| 186365100006113  | Referral to Benefits Agency                                                 | 81888100000103   | Benefits   |
| 217017100000114  | Employment and support allowance status                                     | 83561100000109   | Benefits   |
| 85149100006111   | Benefits assessed                                                           | 85149100006107   | Benefits   |
| 85184100006116   | Benefits advice                                                             | 85184100006100   | Benefits   |
| 85218100006113   | Receiving all benefits                                                      | 85218100006109   | Benefits   |
| 90911100006112   | [RFC] Social welfare                                                        | 90911100006108   | Benefits   |
| 233938100000110  | Personal Independence Payment claim form                                    | 91001100000105   | Benefits   |
| 233947100000119  | Personal Independence Payment claim form completed                          | 91005100000109   | Benefits   |
| 234783100000111  | Personal Independence Payment applied for                                   | 91364100000108   | Benefits   |
| 234787100000113  | Personal Independence Payment                                               | 91366100000109   | Benefits   |
| 92349100006118   | Benefits counselling                                                        | 92349100006102   | Benefits   |
| 192130100006115  | Benefits agency reports unfit for work but fit note no longer needed        | 92548100000108   | Benefits   |
| 15954100006112   | Sacked from job                                                             | 105496009        | Employment |
| 21755100000117   | Sacked from work                                                            | 105496009        | Employment |
| 411974100006119  | Dismissed from job                                                          | 105496009        | Employment |
| 843733100006113  | Care leaver                                                                 | 106467100000107  | Employment |
| 1211649100006117 | Referral to employment support service                                      | 109804100000101  | Employment |
| 1211650100006113 | Employment support                                                          | 109805100000103  | Employment |
| 9781000000118    | Dismissed - notice given                                                    | 122100000107     | Employment |
| 1428214100006111 | Employment status : Unemployed and actively seeking work                    | 1428214100006107 | Employment |
| 1428216100006110 | Employment status : Long-term sick/disabled/receiving sickness and disabili | 1428216100006106 | Employment |
| 1428218100006117 | Employment status : Not receiving sickness/disability benefits and not work | 1428218100006101 | Employment |
| 250175015        | Social group 5 - unskilled                                                  | 160486005        | Employment |
| 250794019        | Partner works after retirement                                              | 160856005        | Employment |
| 250817016        | Partner unemployed                                                          | 160875000        | Employment |
| 250858011        | Recently unemployed                                                         | 160899000        | Employment |
| 250859015        | Chronic unemployment                                                        | 160900005        | Employment |
| 250861012        | Redundant                                                                   | 160901009        | Employment |
| 453663100006114  | Made redundant                                                              | 160901009        | Employment |
| 250862017        | Works after retirement                                                      | 160902002        | Employment |
| 251060015        | Redundancy payment                                                          | 161007002        | Employment |
| 9681000000114    | No employment contract                                                      | 1657100000102    | Employment |
| 9721000000119    | Employ. contract out of date                                                | 1658100000100    | Employment |
| 9791000000116    | Dismissed - immediate                                                       | 1660100000109    | Employment |
| 174617100006114  | GPPAQ not in employment                                                     | 174617100006105  | Employment |
| 187684100006111  | Economic activity status - perm. sick/disabled                              | 187684100006107  | Employment |
| 197956100006112  | Socio-economic classification code (stop smoking): Never worked or unemp    | 197956100006108  | Employment |
| 197958100006119  | Socio-economic classification code (stop smoking): Home carer               | 197958100006103  | Employment |
| 197959100006116  | Socio-economic classification code (stop smoking): Sick or disabled and una | 197959100006100  | Employment |
| 197995100006115  | Socio-economic classification code (stop smoking): Routine and manual occ   | 197995100006104  | Employment |
| 492705100006119  | In paid casual work                                                         | 224364001        | Employment |

## Appendix 1

|                   |                                                                            |                  |             |
|-------------------|----------------------------------------------------------------------------|------------------|-------------|
| 4927061000006117  | In paid seasonal work                                                      | 224365000        | Employment  |
| 4927151000006115  | On a pathway to employment scheme                                          | 224371006        | Employment  |
| 4927211000006110  | Works irregularly                                                          | 224376001        | Employment  |
| 4927261000006113  | Job seeking history                                                        | 224380006        | Employment  |
| 4927271000006118  | Seeking work                                                               | 224381005        | Employment  |
| 4927311000006118  | Registered with job center                                                 | 224384002        | Employment  |
| 4927301000006116  | Registered with job centre                                                 | 224384002        | Employment  |
| 4927341000006119  | Registered with disability employment advisor                              | 224387009        | Employment  |
| 4928391000006112  | Unfair dismissal from job                                                  | 224474004        | Employment  |
| 5182801000006113  | Blind and partially sighted rehabilitation - employment placement          | 243113006        | Employment  |
| 397781013         | Loss of job                                                                | 266956001        | Employment  |
| 5496391000006114  | Lost job                                                                   | 266956001        | Employment  |
| 397786015         | Poor work record                                                           | 266960003        | Employment  |
| 460747011         | [V]Threat of job loss                                                      | 276074009        | Employment  |
| 412067018         | Excess sick leave                                                          | 276076006        | Employment  |
| 5653241000006110  | Parent unemployed                                                          | 281577004        | Employment  |
| 5654251000006114  | Unemployed father                                                          | 281662004        | Employment  |
| 5654261000006111  | Unemployed mother                                                          | 281663009        | Employment  |
| 5897411000006118  | Ability to undertake job application activities                            | 301718001        | Employment  |
| 5897521000006113  | Difficulty undertaking job application activities                          | 301723001        | Employment  |
| 6025441000006119  | Redundancy counselling                                                     | 313084001        | Employment  |
| 250927014         | Finding of job details                                                     | 365526009        | Employment  |
| 6271821000006117  | Job details - finding                                                      | 365526009        | Employment  |
| 460996012         | [V]Unemployment                                                            | 73438004         | Employment  |
| 502435010         | Unemployed                                                                 | 73438004         | Employment  |
| 3694101000006118  | Without employment                                                         | 73438004         | Employment  |
| 3694131000006114  | U/E - Unemployed                                                           | 73438004         | Employment  |
| 3694111000006115  | Out of work                                                                | 73438004         | Employment  |
| 460745015         | [V]Problems related to employment and unemployment                         | 75148009         | Employment  |
| 502935015         | Employment problem                                                         | 75148009         | Employment  |
| 13490511000006117 | Care leaver                                                                | 770347003        | Employment  |
| 8247381000006112  | Referral for employment support                                            | 787421000000102  | Employment  |
| 2170011000000117  | Referral to employability service                                          | 835531000000102  | Employment  |
| 8285121000006112  | Employment support indicated                                               | 844391000000109  | Employment  |
| 141981000000118   | Epilepsy restricts employment                                              | 93141000000105   | Employment  |
| 141991000000116   | Epilepsy prevents employment                                               | 93151000000108   | Employment  |
| 2441101000000110  | NEET - Not in employment, education or training                            | 957481000000103  | Employment  |
| 2441091000000119  | Not in employment, education or training                                   | 957481000000103  | Employment  |
| 8367221000006118  | Current View Education,Employment,Training score - attainment difficulties | 987231000000105  | Employment  |
| 8367231000006115  | Current View Education,Employment,Training score - attendance difficulties | 987241000000101  | Employment  |
| 1876851000006113  | Economic activity status - temp. sick/disabled                             | 1876851000006109 | Employment  |
| 336165015         | Environmental pollution                                                    | 102411008        | Environment |
| 460765010         | Exposure to polluted air                                                   | 102424008        | Environment |
| 460756015         | Exposure to polluted air, occupational                                     | 102425009        | Environment |
| 284471016         | Reg. in deprived area NOS                                                  | 184165003        | Environment |
| 284467019         | Registered in deprived area                                                | 184165003        | Environment |
| 179461000006113   | Registered in deprived area - high                                         | 184166002        | Environment |
| 4924341000006113  | Local environment and neighbourhood details                                | 224153006        | Environment |
| 460774012         | [V]Problem related to physical environment, unspecified                    | 243796009        | Environment |
| 460771016         | [V]Other problems related to physical environment                          | 243796009        | Environment |
| 460763015         | [V]Problems related to physical environment                                | 243796009        | Environment |
| 959051000006118   | Inadequate/unavailable resources                                           | 959051000006102  | Environment |
| 959411000006110   | High pollution level                                                       | 959411000006106  | Environment |
| 959461000006113   | Inadequate/unsafe play/exercise areas                                      | 959461000006109  | Environment |
| 980971000006113   | Inadequate space/resources to foster health                                | 980971000006109  | Environment |
| 169620017         | Homeless family                                                            | 105526001        | Housing     |
| 460968018         | [V]Inadequate housing                                                      | 105531004        | Housing     |
| 460776014         | [V]Problems related to housing and economic circumstances                  | 105531004        | Housing     |
| 371003018         | Housing very unsatisfactory                                                | 105531004        | Housing     |
| 397753019         | Inadequate housing NOS                                                     | 105531004        | Housing     |
| 291191016         | Housing unsatisfactory                                                     | 105531004        | Housing     |
| 504820019         | Housing problem                                                            | 105531004        | Housing     |
| 452431000006113   | Accommodation unsuitable                                                   | 105531004        | Housing     |
| 217521000000110   | Housing unsatisfactory                                                     | 105531004        | Housing     |
| 398074012         | Inadequate housing                                                         | 105531004        | Housing     |
| 291210013         | Overcrowded in house                                                       | 105532006        | Housing     |
| 1227736010        | [V]Lack of heating                                                         | 105535008        | Housing     |
| 291291013         | Lack of heat in house                                                      | 105535008        | Housing     |
| 8452221000006119  | Referred by homeless drop-in centre                                        | 1077211000000104 | Housing     |
| 2714671000000111  | Signposting to housing support service                                     | 1083301000000108 | Housing     |
| 2733781000000113  | Referral to homeless advocacy service                                      | 1091381000000101 | Housing     |
| 2741511000000113  | Declined to disclose housing status                                        | 1094411000000102 | Housing     |
| 2743651000000110  | Living temporarily with friends                                            | 1095421000000107 | Housing     |
| 2743791000000114  | Provision of community outreach care for homeless                          | 1095491000000105 | Housing     |
| 12619001000006114 | Signposting to homeless support service                                    | 1104581000000103 | Housing     |
| 250503019         | Homeless single person                                                     | 160700001        | Housing     |
| 250518018         | Lack of space in house                                                     | 160706007        | Housing     |

## Appendix 1

|                 |                                                                  |                 |         |
|-----------------|------------------------------------------------------------------|-----------------|---------|
| 250541014       | Inappropriate housing                                            | 160721001       | Housing |
| 453501100006117 | Living conditions unsuited to needs                              | 160721001       | Housing |
| 453500100006115 | Housing unsuited to needs                                        | 160721001       | Housing |
| 82868100006119  | Housing dependency scale                                         | 160723003       | Housing |
| 17489100006119  | Lives in sheltered housing                                       | 160729004       | Housing |
| 250562010       | Lives in a welfare home                                          | 160736003       | Housing |
| 250574014       | Living in B&B accommodation                                      | 160744003       | Housing |
| 453520100006114 | Lives in bed and breakfast accommodation                         | 160744003       | Housing |
| 250578012       | Living in lodgings                                               | 160745002       | Housing |
| 250580018       | Lives in a bedsit                                                | 160746001       | Housing |
| 250579016       | Living in bedsitter                                              | 160746001       | Housing |
| 250587015       | Housing problems - eviction                                      | 160751007       | Housing |
| 250589017       | Eviction notice served                                           | 160752000       | Housing |
| 250590014       | Evicted forcibly from house                                      | 160753005       | Housing |
| 250591013       | Tenant evicted                                                   | 160754004       | Housing |
| 82855100006114  | House rented from housing association                            | 160939001       | Housing |
| 251110012       | At risk hypothermia                                              | 161052004       | Housing |
| 41296100006117  | [X]Other problems related to housing & econom circumstances      | 161152002       | Housing |
| 22642100000116  | Homeless enhanced services administration                        | 16630100000107  | Housing |
| 22656100000111  | Homeless enhanced service completed                              | 16646100000103  | Housing |
| 1032100000112   | Rent and rates payment status                                    | 1854100000109   | Housing |
| 185651100006113 | Damp aggravates symptom                                          | 185651100006109 | Housing |
| 285904010       | On urgent housing list                                           | 185955000       | Housing |
| 285905011       | On housing list                                                  | 185956004       | Housing |
| 285906012       | Awaiting housing improvement                                     | 185957008       | Housing |
| 285907015       | Housing problem solved                                           | 185960001       | Housing |
| 185975100006114 | Lives in mobile accommodation                                    | 185975100006105 | Housing |
| 185983100006110 | Lives in caravan                                                 | 185983100006106 | Housing |
| 185990100006113 | Lives in sublet accommodation                                    | 185990100006109 | Housing |
| 185991100006111 | Housing ownership and tenure: not known                          | 185991100006107 | Housing |
| 187218100006110 | Accom status - tenant - local authority/arms length management   | 187218100006106 | Housing |
| 187219100006113 | Accom status - tenant - housing association                      | 187219100006109 | Housing |
| 187220100006111 | Accom status - tenant - private landlord                         | 187220100006107 | Housing |
| 187222100006118 | Accom status - homeless                                          | 187222100006102 | Housing |
| 187223100006115 | Accom status - rough sleeper                                     | 187223100006104 | Housing |
| 187224100006113 | Accom status - squatting                                         | 187224100006109 | Housing |
| 187225100006110 | Accom status - night shelter/emergency or direct access hostel   | 187225100006106 | Housing |
| 187226100006112 | Accom status - sofa surfing                                      | 187226100006108 | Housing |
| 187227100006117 | Accom status - temporary accommodation by local authority        | 187227100006101 | Housing |
| 187228100006119 | Accom status - staying with friends/family as a short term guest | 187228100006103 | Housing |
| 187229100006116 | Accom status - other homeless                                    | 187229100006100 | Housing |
| 187245100006111 | Accom status - Foyer - ages 16-25 homeless or in housing need    | 187245100006107 | Housing |
| 187260100006114 | Accom status - mobile accommodation                              | 187260100006105 | Housing |
| 189215100006112 | CPU risk factor (parent/carer) - housing/accommodation           | 189215100006108 | Housing |
| 189445100006110 | No longer homeless                                               | 189445100006106 | Housing |
| 189586100006114 | Child affected by significant housing need                       | 189586100006105 | Housing |
| 193452100006115 | Parenting intervention delivered by housing association          | 193452100006104 | Housing |
| 195096100006110 | Referral to homeless team                                        | 195096100006106 | Housing |
| 195100100006118 | Patient discharge, sofa surfing                                  | 195100100006102 | Housing |
| 195104100006116 | Discharge to rented accommodation                                | 195104100006100 | Housing |
| 195105100006119 | Discharge to council accommodation                               | 195105100006103 | Housing |
| 195107100006112 | Discharge to bed and breakfast accommodation                     | 195107100006108 | Housing |
| 195109100006113 | Referral to rough sleeper outreach team                          | 195109100006109 | Housing |
| 195110100006119 | Referral to day centre for homeless                              | 195110100006103 | Housing |
| 195111100006116 | Referral to support worker for homeless                          | 195111100006100 | Housing |
| 199663100006115 | Support to obtain accommodation or housing                       | 199663100006104 | Housing |
| 199945100006118 | Prevention of accommodation loss                                 | 199945100006102 | Housing |
| 200264100006117 | Referral to homeless advocacy service                            | 200264100006101 | Housing |
| 200292100006119 | Assertive outreach in the care of the homeless                   | 200292100006103 | Housing |
| 200400100006118 | Declined referral to homeless advocacy service                   | 200400100006102 | Housing |
| 63625100000114  | Asthma trigger - damp                                            | 20120100000105  | Housing |
| 806103100006119 | Asthma trigger - damp                                            | 20120100000105  | Housing |
| 201568100006119 | Problem with accommodation                                       | 201568100006103 | Housing |
| 337197014       | Lives in rented accommodation                                    | 224213000       | Housing |
| 492521100006118 | Lives in furnished rented accommodation                          | 224214006       | Housing |
| 492522100006114 | Lives in unfurnished rented accommodation                        | 224215007       | Housing |
| 492536100006113 | No fixed abode                                                   | 224226001       | Housing |
| 492537100006118 | NFA - No fixed abode                                             | 224226001       | Housing |
| 337216012       | Living rough                                                     | 224228000       | Housing |
| 492542100006113 | Temporary shelter arrangements                                   | 224230003       | Housing |
| 492550100006119 | Status of waiting list for accommodation                         | 224238005       | Housing |
| 492552100006112 | On waiting list for accommodation                                | 224239002       | Housing |
| 492563100006114 | Lack of space for privacy in accommodation                       | 224248007       | Housing |
| 492568100006110 | Rising damp in home                                              | 224252007       | Housing |
| 492571100006111 | Mould growth in home                                             | 224255009       | Housing |
| 492573100006117 | Mould on surfaces in home                                        | 224256005       | Housing |
| 492584100006115 | Adequacy of living space                                         | 224263005       | Housing |

## Appendix 1

|                   |                                                                         |                 |         |
|-------------------|-------------------------------------------------------------------------|-----------------|---------|
| 4925941000006113  | Dirty home                                                              | 224270005       | Housing |
| 4930951000006115  | Fixed-site mobile home                                                  | 224665006       | Housing |
| 4931071000006116  | Hostel for the homeless                                                 | 224675009       | Housing |
| 4932341000006115  | Dirty environment                                                       | 224783005       | Housing |
| 4932351000006118  | Damp environment                                                        | 224784004       | Housing |
| 4939561000006119  | Housing assessment                                                      | 225340009       | Housing |
| 343641000006117   | [V]Other problems related/housing and economic circumstances            | 243796009       | Housing |
| 405061000000116   | Living in temporary housing                                             | 247521000000104 | Housing |
| 5385491000006118  | Hostel                                                                  | 257628001       | Housing |
| 5385641000006112  | Mobile home                                                             | 257641002       | Housing |
| 250509015         | Housing lack NOS                                                        | 266935003       | Housing |
| 397751017         | Housing lack                                                            | 266935003       | Housing |
| 397752012         | House in poor repair                                                    | 266936002       | Housing |
| 397756010         | Living in hostel                                                        | 266939009       | Housing |
| 5496121000006110  | Lives in residential hostel                                             | 266939009       | Housing |
| 334561015         | [X]Lack of water, occurrence at home                                    | 269703005       | Housing |
| 334560019         | [X]Lack of water                                                        | 269703005       | Housing |
| 285909017         | Awaiting housing NOS                                                    | 271364002       | Housing |
| 500881000006110   | Awaiting housing or re-housing                                          | 271364002       | Housing |
| 5523881000006110  | Finding relating to awaiting housing or re-housing                      | 271364002       | Housing |
| 411615019         | Housing - awaiting action                                               | 275643002       | Housing |
| 5687821000006116  | Residential caravan park                                                | 284451009       | Housing |
| 5697331000006111  | Cold environment                                                        | 285123000       | Housing |
| 341191000006116   | [V]Housing, household and economic circumstances                        | 288531000119103 | Housing |
| 5903521000006114  | Housing, local environment and transport detail                         | 302149003       | Housing |
| 453150016         | Unsatisfactory living conditions                                        | 308899009       | Housing |
| 453151017         | Slum housing                                                            | 309683008       | Housing |
| 6003681000006117  | Housing report status                                                   | 310853003       | Housing |
| 454372016         | Housing report                                                          | 310854009       | Housing |
| 454373014         | Housing report requested                                                | 310855005       | Housing |
| 454374015         | Housing report sent                                                     | 310856006       | Housing |
| 454375019         | Housing report paid                                                     | 310857002       | Housing |
| 6012761000006113  | Incapacity benefit                                                      | 312094004       | Housing |
| 7975861000006110  | DS4 attendance allowance examination payment claim less than 1.5 hours, | 3181000000103   | Housing |
| 7975951000006116  | DS4 attendance allowance examination fee unpaid                         | 3201000000104   | Housing |
| 485356010         | Homeless                                                                | 32911000        | Housing |
| 6260921000006111  | Feature of homelessness                                                 | 364701009       | Housing |
| 6260931000006114  | Details of awaiting housing or re-housing                               | 364702002       | Housing |
| 488727013         | Characteristics of home environment - finding                           | 365512000       | Housing |
| 752321000000118   | Sofa surfer - person of no fixed abode                                  | 381751000000106 | Housing |
| 1480173012        | Housing related procedures                                              | 385985008       | Housing |
| 91151000000111    | Referral to housing department                                          | 38921000000104  | Housing |
| 1786092012        | Damp housing                                                            | 398081001       | Housing |
| 1777647018        | Damp in house                                                           | 398081001       | Housing |
| 6597501000006119  | Damp in home                                                            | 398081001       | Housing |
| 460967011         | [V]Lack of housing                                                      | 398341000000102 | Housing |
| 12458771000006118 | [V]Lack of housing                                                      | 398341000000102 | Housing |
| 6723681000006110  | Living temporarily with relatives                                       | 406132007       | Housing |
| 2576303013        | Housing education, guidance, and counselling                            | 410297008       | Housing |
| 6795881000006115  | Housing case management                                                 | 410341008       | Housing |
| 7025931000006117  | Dirty living conditions                                                 | 424415008       | Housing |
| 460770015         | Water supply insufficient                                               | 424466003       | Housing |
| 757521000000112   | Length of time homeless                                                 | 442244004       | Housing |
| 8186591000006114  | Lives in housing association rented accommodation                       | 491761000000102 | Housing |
| 2286501000000119  | Under care of homeless advocacy service                                 | 702526004       | Housing |
| 1716301000000118  | Housing assessment completed                                            | 704045001       | Housing |
| 8249091000006117  | Referral by housing service                                             | 790331000000107 | Housing |
| 285903016         | Letter written to housing                                               | 807261000000105 | Housing |
| 12618181000006113 | At risk of homelessness                                                 | 82531000000100  | Housing |
| 3848311000006110  | Living in mobile home                                                   | 82876001        | Housing |
| 14338741000006113 | Lives in mobile home                                                    | 82876001        | Housing |
| 3866031000006114  | Hypothermia caused by cold environment                                  | 83966006        | Housing |
| 3866021000006111  | Hypothermia due to cold environment                                     | 83966006        | Housing |
| 856001000006119   | Housing conditions                                                      | 856001000006103 | Housing |
| 2312161000000117  | Discharge from homeless advocacy service                                | 898811000000106 | Housing |
| 905961000006114   | [RFC] Housing and welfare advice                                        | 905961000006105 | Housing |
| 909331000006116   | [RFC] Housing assessment                                                | 909331000006100 | Housing |
| 2341611000000113  | No hot water in home                                                    | 910981000000102 | Housing |
| 939591000006119   | Housing status                                                          | 939591000006103 | Housing |
| 940741000006110   | Homeless within the past year                                           | 940741000006106 | Housing |
| 958501000006115   | Inadequate food storage/disposal                                        | 958501000006104 | Housing |
| 958531000006111   | Inadequate water supply                                                 | 958531000006107 | Housing |
| 958781000006117   | Inadequate sewage disposal                                              | 958781000006101 | Housing |
| 958811000006115   | Inadequate laundry facilities                                           | 958811000006104 | Housing |
| 958871000006112   | Inadequate heating/cooling                                              | 958871000006108 | Housing |
| 959211000006114   | Inadequate/crowded living space                                         | 959211000006105 | Housing |
| 959371000006114   | Homeless                                                                | 959371000006105 | Housing |

## Appendix 1

|                   |                                                       |                  |         |
|-------------------|-------------------------------------------------------|------------------|---------|
| 968381000006110   | Has no fixed abode                                    | 968381000006106  | Housing |
| 982341000006115   | At risk of hypothermia                                | 982341000006104  | Housing |
| 982361000006116   | Damp/condensation                                     | 982361000006100  | Housing |
| 982961000006117   | Lack of personal care facilities                      | 982961000006101  | Housing |
| 994091000006118   | Living in temporary housing                           | 994091000006102  | Housing |
| 8428631000006118  | Economic wellbeing intervention                       | 1054421000000104 | Income  |
| 169689019         | Bankruptcy                                            | 105577008        | Income  |
| 1227737018        | [V]Poverty NOS                                        | 11403006         | Income  |
| 460780016         | [V]Extreme poverty                                    | 11403006         | Income  |
| 19738011          | Poverty                                               | 11403006         | Income  |
| 2681741000006112  | Financially poor                                      | 11403006         | Income  |
| 1227738011        | [V]Economic problem                                   | 160932005        | Income  |
| 460969014         | [V]Inadequate material resources                      | 160932005        | Income  |
| 250937016         | Financial problem                                     | 160932005        | Income  |
| 250938014         | In debt                                               | 160933000        | Income  |
| 250939018         | Financial circumstances change                        | 160934006        | Income  |
| 283508015         | Economic rehab. measures                              | 183439000        | Income  |
| 816951000006114   | Has free prescriptions - low income                   | 184782008        | Income  |
| 1892191000006118  | CPU risk factor (parent/carer) - poverty/financial    | 1892191000006102 | Income  |
| 1898181000006118  | Born into single parent family                        | 1898181000006102 | Income  |
| 1911671000006114  | Barrier to parental engagement - finance              | 1911671000006105 | Income  |
| 1979211000006112  | Referred for social/financial support                 | 1979211000006108 | Income  |
| 2008441000006116  | Child affected by poverty                             | 2008441000006100 | Income  |
| 36839019          | Single parent family                                  | 21959005         | Income  |
| 4924541000006116  | Financial circumstances                               | 224164009        | Income  |
| 4924621000006110  | No household income                                   | 224169004        | Income  |
| 4924631000006113  | Low household income                                  | 224170003        | Income  |
| 4924691000006112  | No personal income                                    | 224174007        | Income  |
| 4924701000006112  | Low personal income                                   | 224175008        | Income  |
| 4924871000006110  | Sufficiency of income for needs                       | 224189003        | Income  |
| 4924911000006113  | Income insufficient to meet needs                     | 224191006        | Income  |
| 223711000000111   | Shop lifting                                          | 248035003        | Income  |
| 370296019         | Shoplifting                                           | 248035003        | Income  |
| 397763010         | Single parent                                         | 266943008        | Income  |
| 142681000006113   | Single parent family - mother                         | 266977003        | Income  |
| 412068011         | Business ceased - financial                           | 276077002        | Income  |
| 1591621000006118  | Destitute                                             | 284477001        | Income  |
| 5883391000006112  | Unable to manage personal financial activities        | 300683002        | Income  |
| 5883431000006118  | Difficulty managing personal financial activities     | 300686005        | Income  |
| 5883501000006110  | Difficulty with money management                      | 300692004        | Income  |
| 1780263012        | Needs help managing own financial affairs             | 401058009        | Income  |
| 6729071000006118  | Income needs assessment                               | 406536004        | Income  |
| 2549598015        | At risk of financial/material mismanagement           | 417051004        | Income  |
| 460781017         | Low income                                            | 424860001        | Income  |
| 460782012         | [V]Insufficient social insurance and welfare support  | 456281000000100  | Income  |
| 12458681000006114 | [V]Insufficient social insurance and welfare support  | 456281000000100  | Income  |
| 7680551000006114  | Referral to financial service                         | 710913009        | Income  |
| 1756731000000119  | Wishes to see money advisor                           | 785511000000101  | Income  |
| 958451000006117   | Low/no income                                         | 958451000006101  | Income  |
| 958461000006115   | Difficulty with money management                      | 958461000006104  | Income  |
| 958471000006110   | Able to buy only necessities                          | 958471000006106  | Income  |
| 958481000006113   | Difficulty buying necessities                         | 958481000006109  | Income  |
| 2508981000000114  | Personal financial circumstances reviewed             | 986691000000106  | Income  |
| 256145015         | Neglected appearance                                  | 102892007        | Neglect |
| 252576015         | Hunger pain                                           | 162043005        | Neglect |
| 253445019         | Irregular meal frequency                              | 162552006        | Neglect |
| 253447010         | Rarely has breakfast                                  | 162554007        | Neglect |
| 324687017         | Effects of hunger NOS                                 | 212966005        | Neglect |
| 324683018         | Effects of hunger                                     | 212966005        | Neglect |
| 324690011         | Deprivation of water                                  | 212971003        | Neglect |
| 901301000006111   | Accident neglect:hunger/thirst                        | 217632008        | Neglect |
| 452251000006119   | Accidents due to hunger, thirst, exposure and neglect | 217632008        | Neglect |
| 334549011         | [X]Lack of food, occurrence at home                   | 217640002        | Neglect |
| 334548015         | [X]Lack of food                                       | 217640002        | Neglect |
| 329877015         | Accident due to hunger                                | 217640002        | Neglect |
| 329875011         | Accident due to lack of food                          | 217640002        | Neglect |
| 5252341000006111  | Neglect of clothes                                    | 248055002        | Neglect |
| 5252351000006113  | Neglect of personal hygiene                           | 248056001        | Neglect |
| 5252361000006110  | Neglect of physical health                            | 248057005        | Neglect |
| 5252371000006115  | Neglect of dental care                                | 248058000        | Neglect |
| 5253681000006117  | Inadequately dressed                                  | 248161002        | Neglect |
| 5281431000006114  | Fastening of footwear inadequate                      | 250160007        | Neglect |
| 5281501000006117  | Material used to construct footwear inadequate        | 250165002        | Neglect |
| 404240011         | Accident due to thirst                                | 269703005        | Neglect |
| 404239014         | Accident due to lack of water                         | 269703005        | Neglect |
| 324684012         | Deprivation of food                                   | 287519002        | Neglect |
| 494331000000112   | Patient not registered with a dentist                 | 413314002        | Neglect |

## Appendix 1

|                   |                                                                             |                  |                              |
|-------------------|-----------------------------------------------------------------------------|------------------|------------------------------|
| 6839591000006112  | Patient not registered with dentist                                         | 413314002        | Neglect                      |
| 1692561000000118  | Rarely has evening meal                                                     | 449279001        | Neglect                      |
| 899851000006114   | Deprivation of food                                                         | 696931000000104  | Neglect                      |
| 1692101000000112  | Rarely has lunch                                                            | 763191000000104  | Neglect                      |
| 1748121000000117  | Replaces meals with drinks                                                  | 781911000000108  | Neglect                      |
| 419821000006111   | [X]Persons with potential health hazards related to socioeconomic and psych | 161152002        | Other socioeconomic measures |
| 251263011         | Poor social circumstances                                                   | 161154001        | Other socioeconomic measures |
| 283509011         | Other socioeconomic measures                                                | 183441004        | Other socioeconomic measures |
| 12716881000006110 | Other socioeconomic measures                                                | 183441004        | Other socioeconomic measures |
| 2005971000006110  | Exposure to determinant of health inequality: Social                        | 2005971000006106 | Other socioeconomic measures |
| 325630015         | [X]Effect of deprivation, unspecified                                       | 285153007        | Other socioeconomic measures |
| 636771000006116   | Effect of deprivation, unspecified                                          | 285153007        | Other socioeconomic measures |
| 460784013         | Problem related to social environment                                       | 288531000119103  | Other socioeconomic measures |
| 5903501000006116  | Legal, financial, employment and socioeconomic history detail               | 302148006        | Other socioeconomic measures |
| 325625019         | [X]Other effects of deprivation                                             | 417163006        | Other socioeconomic measures |
| 2652211000000114  | Signposting to Citizens Advice                                              | 1053761000000102 | Support service              |
| 8439191000006118  | Referral to food bank                                                       | 1066291000000102 | Support service              |
| 8439181000006116  | Referral to foodbank                                                        | 1066291000000102 | Support service              |
| 2714901000000112  | Signposting to food bank                                                    | 1083401000000103 | Support service              |
| 2719371000000116  | Signposting to support service for carers                                   | 1085401000000104 | Support service              |
| 1938021000006119  | Food bank voucher issued to patient                                         | 1938021000006103 | Support service              |
| 405361000000118   | Refer to Citizens Advice Bureau                                             | 247671000000104  | Support service              |
| 752841000000117   | Referral to affordable warmth programme                                     | 382011000000100  | Support service              |
| 1961531000006113  | Referral to community meals service                                         | 713109004        | Support service              |
| 851911000006110   | Referral to citizens advice bureau                                          | 851911000006106  | Support service              |
| 1868341000006113  | Provision of written information about Affordable Warmth programme          | 860251000000109  | Support service              |
| 250495019         | Transport economic problems                                                 | 160695008        | Transport                    |
| 397197011         | Invalid transport facilities                                                | 266738008        | Transport                    |
| 450289016         | No car                                                                      | 307109002        | Transport                    |
| 8220881000006115  | Fuel poverty                                                                | 719781000000101  | Transport                    |
